# Supplementary material
Source: ML conference proceedings conference paper supplement (https://openreview.net/forum?id=uLOZyM12LJ)
Supplement: supplementary_material [file svd_projection_full-llama.xlsx]

## Sheet: metrics
model	layer	proj	ckpt	mean_r_stack	median_r_stack	p95_r_stack	sigma1	sigma2	phi	mean_r_self	median_r_self	p95_r_self
Llama	1	down	ckpt-140	0.0463991	0.0437822	0.0911508	3.31498	3.30563	10.9581	0.0647545	0.0605376	0.128207
Llama	1	down	ckpt-1100	0.0473096	0.0445741	0.0924074	3.31287	3.28765	10.8916	0.0646266	0.0605695	0.12603
Llama	1	down	ckpt-69	0.0467278	0.0434359	0.0921794	3.30987	3.3031	10.9329	0.064628	0.0607793	0.125116
Llama	1	q	ckpt-140	0.0358273	0.0335348	0.068799	2.3146	2.30415	5.3332	0.0459967	0.0433512	0.0902571
Llama	1	q	ckpt-1100	0.0360346	0.0338402	0.0701664	2.32768	2.30506	5.36545	0.0461416	0.0436087	0.0888838
Llama	1	q	ckpt-69	0.0367975	0.034732	0.0714383	2.31753	2.30195	5.33484	0.0459414	0.0436	0.0892685
Llama	1	k	ckpt-140	0.0497257	0.0455984	0.0995705	1.73545	1.72985	3.00207	0.0677668	0.0643581	0.133554
Llama	1	k	ckpt-1100	0.0477053	0.0445975	0.093658	1.75073	1.74589	3.05658	0.0685793	0.0645472	0.137025
Llama	1	k	ckpt-69	0.0494436	0.0464336	0.0984023	1.75742	1.74606	3.06856	0.0687275	0.065182	0.13424
Llama	1	v	ckpt-140	0.0496786	0.0469689	0.0975771	1.75974	1.74357	3.06823	0.0683701	0.0649419	0.134019
Llama	1	v	ckpt-1100	0.0495042	0.0473931	0.0952201	1.74278	1.73559	3.02476	0.0679478	0.0633992	0.132204
Llama	1	v	ckpt-69	0.0474487	0.0455	0.0896012	1.75686	1.73679	3.0513	0.0685946	0.0663387	0.133614
Llama	20	down	ckpt-140	0.0469457	0.0445485	0.0918188	3.308	3.29395	10.8964	0.0647197	0.0611243	0.125728
Llama	20	down	ckpt-1100	0.0469274	0.0443391	0.0928883	3.30779	3.29365	10.8947	0.0649119	0.0611482	0.12461
Llama	20	down	ckpt-69	0.0466772	0.0443786	0.090185	3.3154	3.3063	10.9617	0.0646678	0.0603397	0.129572
Llama	20	q	ckpt-140	0.0359427	0.0335579	0.0715124	2.32292	2.302	5.34737	0.046037	0.04288	0.0891459
Llama	20	q	ckpt-1100	0.0363946	0.0340647	0.0706445	2.33385	2.32219	5.41964	0.0460751	0.0428585	0.0909783
Llama	20	q	ckpt-69	0.0359604	0.0337755	0.0705929	2.33217	2.31897	5.40822	0.0463257	0.0435692	0.0883297
Llama	20	k	ckpt-140	0.0489265	0.0461468	0.0938728	1.74913	1.74156	3.04623	0.0684387	0.0650337	0.134415
Llama	20	k	ckpt-1100	0.0490254	0.0469997	0.0940804	1.74013	1.7303	3.01094	0.067452	0.063593	0.13766
Llama	20	k	ckpt-69	0.0491542	0.0472463	0.0953664	1.75034	1.74529	3.05485	0.068913	0.0653633	0.129622
Llama	20	v	ckpt-140	0.0483724	0.0462583	0.091189	1.75236	1.73909	3.04752	0.0689209	0.0646511	0.129561
Llama	20	v	ckpt-1100	0.0497549	0.0463156	0.0992747	1.75715	1.74255	3.06191	0.0684898	0.0644065	0.133339
Llama	20	v	ckpt-69	0.0482377	0.04454	0.09183	1.75424	1.74188	3.05568	0.0682271	0.0638855	0.135836
Llama	40	down	ckpt-140	0.0471809	0.0438199	0.0931432	3.3164	3.30857	10.9726	0.0648172	0.0609938	0.12614
Llama	40	down	ckpt-1100	0.0466957	0.0442478	0.0907826	3.31081	3.30222	10.933	0.0649805	0.0612664	0.12593
Llama	40	down	ckpt-69	0.0460793	0.0435617	0.0904527	3.31971	3.31179	10.9942	0.0645442	0.060452	0.128027
Llama	40	q	ckpt-140	0.0361483	0.0336783	0.0706013	2.30273	2.29746	5.29043	0.0458289	0.0429057	0.0895603
Llama	40	q	ckpt-1100	0.0364207	0.0341251	0.0706546	2.32323	2.30207	5.34825	0.0459588	0.0425486	0.091262
Llama	40	q	ckpt-69	0.03613	0.0342952	0.0695269	2.3212	2.30033	5.33953	0.0458781	0.0428847	0.0916656
Llama	40	k	ckpt-140	0.0491716	0.0461188	0.0948042	1.75291	1.74482	3.05851	0.0686526	0.0651351	0.132236
Llama	40	k	ckpt-1100	0.0487986	0.0461794	0.0950765	1.75788	1.74343	3.06475	0.0691295	0.0657218	0.129915
Llama	40	k	ckpt-69	0.0495909	0.0460138	0.0969954	1.75679	1.75112	3.07634	0.0687304	0.0657003	0.135245
Llama	40	v	ckpt-140	0.0474766	0.0456956	0.0906943	1.75176	1.74932	3.06438	0.0684893	0.0632164	0.134187
Llama	40	v	ckpt-1100	0.0491871	0.0467862	0.0953679	1.74624	1.72945	3.02003	0.068273	0.065687	0.133687
Llama	40	v	ckpt-69	0.0498023	0.0471239	0.0960591	1.74502	1.73855	3.03379	0.0681724	0.0644078	0.135505
Qwen	1	down	ckpt-120	0.0950406	0.0802594	0.204147	6.46927	4.80486	31.0839	0.0899437	0.0750062	0.194625
Qwen	1	down	ckpt-800	0.0950391	0.0802422	0.204231	6.44757	5.11274	32.9647	0.0922215	0.0777311	0.199602
Qwen	1	down	ckpt-29	0.0950399	0.0802572	0.204234	6.34811	4.96647	31.5277	0.0924289	0.077333	0.197847
Qwen	1	q	ckpt-120	0.120471	0.0471055	0.275845	22.8841	14.8786	340.482	0.120494	0.0471681	0.275984
Qwen	1	q	ckpt-800	0.120474	0.0471137	0.275843	22.8841	14.8783	340.476	0.120472	0.0470952	0.275849
Qwen	1	q	ckpt-29	0.120472	0.0471228	0.275851	22.884	14.8785	340.479	0.120493	0.0471232	0.275924
Qwen	1	k	ckpt-120	0.177045	0.138712	0.442787	4.13426	3.26697	13.5065	0.180163	0.140068	0.470755
Qwen	1	k	ckpt-800	0.17704	0.138685	0.442798	4.05835	3.18359	12.9201	0.177273	0.142067	0.440439
Qwen	1	k	ckpt-29	0.177041	0.138688	0.442809	4.11036	3.27455	13.4596	0.179406	0.139475	0.462516
Qwen	1	v	ckpt-120	0.0384276	0.0229446	0.123896	1.24005	0.95947	1.18979	0.0393729	0.0244114	0.13292
Qwen	1	v	ckpt-800	0.0384185	0.0229175	0.123925	1.23839	1.00485	1.24439	0.0391507	0.0235992	0.136879
Qwen	1	v	ckpt-29	0.0384138	0.022939	0.123958	1.23649	0.994933	1.23022	0.0396473	0.0236498	0.13419
Qwen	15	down	ckpt-120	0.0881579	0.0740117	0.18756	9.66251	4.64762	44.9077	0.0890999	0.0746319	0.191179
Qwen	15	down	ckpt-800	0.0881574	0.074012	0.187557	9.67037	4.64902	44.9577	0.0892267	0.0745842	0.187916
Qwen	15	down	ckpt-29	0.0881575	0.0740222	0.187581	9.66215	4.78679	46.2507	0.0897481	0.0741052	0.19958
Qwen	15	q	ckpt-120	0.0664308	0.0476854	0.177987	4.02364	3.8134	15.3437	0.0647451	0.0445315	0.17515
Qwen	15	q	ckpt-800	0.0664308	0.0476504	0.178018	4.03368	3.90641	15.7572	0.0698961	0.0508072	0.189563
Qwen	15	q	ckpt-29	0.0664304	0.0476521	0.178033	4.02047	3.90468	15.6987	0.0742227	0.0574312	0.192488
Qwen	15	k	ckpt-120	0.0911466	0.0562676	0.293902	2.19363	2.14982	4.71589	0.0876529	0.0534407	0.277485
Qwen	15	k	ckpt-800	0.0911524	0.0562696	0.293855	2.18577	2.16302	4.72787	0.092981	0.0622976	0.297749
Qwen	15	k	ckpt-29	0.09115	0.0562578	0.293858	2.23834	2.16631	4.84894	0.0828449	0.0470227	0.275932
Qwen	15	v	ckpt-120	0.058809	0.0446443	0.159895	1.32096	1.23215	1.62762	0.0620118	0.0453339	0.170896
Qwen	15	v	ckpt-800	0.0588106	0.0446777	0.159886	1.29943	1.23956	1.61072	0.0605325	0.0450159	0.169374
Qwen	15	v	ckpt-29	0.0588115	0.0446833	0.159893	1.25226	1.23126	1.54185	0.0603912	0.045488	0.161401
Qwen	28	down	ckpt-120	0.0525742	0.0391481	0.10601	7.96379	5.01189	39.9137	0.0520812	0.0388432	0.108258
Qwen	28	down	ckpt-800	0.0525743	0.039084	0.105966	7.957	5.05074	40.1887	0.0521358	0.0383964	0.108965
Qwen	28	down	ckpt-29	0.0525473	0.0391577	0.105955	7.96053	5.04007	40.1216	0.0533634	0.03997	0.104606
Qwen	28	q	ckpt-120	0.0697221	0.0353819	0.201405	7.84311	5.06366	39.7148	0.069614	0.0345809	0.197493
Qwen	28	q	ckpt-800	0.0697222	0.0354067	0.201418	7.84506	5.07337	39.8009	0.0699847	0.035726	0.203509
Qwen	28	q	ckpt-29	0.0697211	0.0353982	0.201433	7.84494	5.12806	40.2293	0.0698683	0.0345278	0.209825
Qwen	28	k	ckpt-120	0.0995012	0.082022	0.237047	2.00693	1.89286	3.79884	0.102578	0.0887858	0.229438
Qwen	28	k	ckpt-800	0.0995012	0.0820484	0.237064	2.0237	1.86839	3.78106	0.100319	0.0848999	0.232338
Qwen	28	k	ckpt-29	0.0995016	0.0820563	0.237057	2.02846	1.91757	3.88972	0.101923	0.0894597	0.231271
Qwen	28	v	ckpt-120	0.238469	0.219652	0.490312	4.50356	4.20855	18.9535	0.239	0.225059	0.485023
Qwen	28	v	ckpt-800	0.238468	0.219633	0.49029	4.43913	4.27056	18.9576	0.240404	0.22902	0.482317
Qwen	28	v	ckpt-29	0.238469	0.219628	0.490303	4.52176	4.21462	19.0575	0.242815	0.23141	0.479774
