# Supplementary material
Source: ML conference proceedings conference paper supplement (https://openreview.net/forum?id=uLOZyM12LJ)
Supplement: supplementary_material [file svd_projection_full-qwen.xlsx]

## Sheet: metrics
layer	proj	ckpt	mean_r_stack	median_r_stack	p95_r_stack	sigma1	sigma2	phi	mean_r_self	median_r_self	p95_r_self
1	down	ckpt-120	0.0890448	0.0739358	0.189809	6.45938	5.01676	32.4051	0.0916298	0.0770676	0.197895
1	down	ckpt-800	0.0890464	0.0739893	0.18976	6.31132	5.10817	32.2393	0.0929601	0.0771959	0.201277
1	down	ckpt-29	0.0890467	0.0740189	0.189755	6.42556	4.89149	31.4306	0.0923925	0.077473	0.198882
1	q	ckpt-120	0.120493	0.0471799	0.2759	22.884	14.8785	340.48	0.120491	0.047138	0.275846
1	q	ckpt-800	0.120496	0.047187	0.275888	22.8841	14.8784	340.479	0.120502	0.047157	0.275855
1	q	ckpt-29	0.120495	0.0471529	0.275905	22.884	14.8782	340.474	0.120498	0.0471568	0.275834
1	k	ckpt-120	0.179974	0.140057	0.47091	4.09663	3.16874	12.9811	0.175471	0.139469	0.446166
1	k	ckpt-800	0.179972	0.140024	0.470888	4.09978	3.29907	13.5255	0.179503	0.140969	0.462098
1	k	ckpt-29	0.179972	0.140017	0.47086	4.12553	3.32697	13.7255	0.180787	0.141722	0.467768
1	v	ckpt-120	0.0396249	0.0244861	0.135301	1.24056	1.00177	1.24275	0.0383994	0.0227624	0.125943
1	v	ckpt-800	0.0396196	0.0245873	0.135257	1.23138	0.994313	1.22438	0.038295	0.0236703	0.124434
1	v	ckpt-29	0.0396127	0.0245606	0.135257	1.23839	0.931096	1.15306	0.0399252	0.0252923	0.12113
15	down	ckpt-120	0.0901318	0.0751935	0.194956	9.66899	4.80263	46.4365	0.0896046	0.0746619	0.191994
15	down	ckpt-800	0.0901321	0.0751718	0.194944	9.66668	4.59342	44.4031	0.0881853	0.0735077	0.188983
15	down	ckpt-29	0.0901325	0.0751824	0.194953	9.66757	4.90092	47.38	0.0909815	0.0761636	0.198393
15	q	ckpt-120	0.0662207	0.0471393	0.180543	4.06441	3.82127	15.5312	0.0684328	0.0510632	0.177544
15	q	ckpt-800	0.0662212	0.0471351	0.180521	3.99317	3.92581	15.6764	0.0701443	0.0524841	0.184112
15	q	ckpt-29	0.0662208	0.0471535	0.180529	3.95352	3.85397	15.2367	0.0668294	0.0481902	0.180931
15	k	ckpt-120	0.085907	0.0506135	0.269113	2.25704	2.13561	4.82015	0.0785292	0.0409075	0.273983
15	k	ckpt-800	0.0859047	0.0506223	0.269065	2.21128	2.19117	4.8453	0.0798062	0.0464383	0.255283
15	k	ckpt-29	0.0859038	0.0506151	0.269061	2.22864	2.17873	4.85561	0.0755782	0.0345975	0.264502
15	v	ckpt-120	0.0598994	0.0423873	0.168252	1.31111	1.23577	1.62023	0.0610208	0.043653	0.161383
15	v	ckpt-800	0.059901	0.0424247	0.168313	1.289	1.22845	1.58347	0.0600073	0.0463874	0.16834
15	v	ckpt-29	0.0599004	0.0424135	0.168331	1.31246	1.26248	1.65696	0.0632773	0.0470094	0.170987
28	down	ckpt-120	0.0521672	0.03888	0.103974	7.94964	5.20188	41.3531	0.0522843	0.0388697	0.10361
28	down	ckpt-800	0.0521684	0.0388575	0.10413	7.95564	5.17872	41.2	0.0514974	0.037817	0.105398
28	down	ckpt-29	0.0521411	0.0388942	0.104184	7.95431	4.9652	39.4948	0.0540059	0.0408983	0.109115
28	q	ckpt-120	0.0696018	0.0344204	0.211837	7.84277	5.08551	39.8845	0.0701272	0.0350572	0.211973
28	q	ckpt-800	0.0696027	0.0344719	0.21192	7.84041	5.13298	40.2447	0.0698974	0.0342799	0.209945
28	q	ckpt-29	0.0696016	0.0344926	0.211923	7.84446	5.12621	40.2123	0.0693079	0.0340659	0.20672
28	k	ckpt-120	0.102249	0.0871137	0.238804	2.05241	1.93348	3.96829	0.10422	0.0890434	0.228588
28	k	ckpt-800	0.102252	0.0871037	0.238847	2.06143	1.91465	3.94691	0.102603	0.0860973	0.229276
28	k	ckpt-29	0.102256	0.0871017	0.238834	2.05229	1.86352	3.82449	0.100969	0.0855986	0.220349
28	v	ckpt-120	0.239127	0.226019	0.480132	4.53705	4.16663	18.9042	0.238668	0.225166	0.478507
28	v	ckpt-800	0.239123	0.226012	0.480091	4.52626	4.25503	19.2594	0.242906	0.234425	0.476612
28	v	ckpt-29	0.239124	0.226004	0.480101	4.49584	4.25935	19.1493	0.240858	0.226906	0.485726
