# Supplementary material
Source: ML conference proceedings conference paper supplement (https://openreview.net/forum?id=uLOZyM12LJ)
Supplement: supplementary_material [file svd_projection_full-qwen.xlsx]

## Sheet: metrics
layer	proj	ckpt	mean_r_stack	median_r_stack	p95_r_stack	sigma1	sigma2	phi	mean_r_self	median_r_self	p95_r_self
1	down	ckpt-120	0.0950406	0.0802594	0.204147	6.46927	4.80486	31.0839	0.0899437	0.0750062	0.194625
1	down	ckpt-800	0.0950391	0.0802422	0.204231	6.44757	5.11274	32.9647	0.0922215	0.0777311	0.199602
1	down	ckpt-29	0.0950399	0.0802572	0.204234	6.34811	4.96647	31.5277	0.0924289	0.077333	0.197847
1	q	ckpt-120	0.120471	0.0471055	0.275845	22.8841	14.8786	340.482	0.120494	0.0471681	0.275984
1	q	ckpt-800	0.120474	0.0471137	0.275843	22.8841	14.8783	340.476	0.120472	0.0470952	0.275849
1	q	ckpt-29	0.120472	0.0471228	0.275851	22.884	14.8785	340.479	0.120493	0.0471232	0.275924
1	k	ckpt-120	0.177045	0.138712	0.442787	4.13426	3.26697	13.5065	0.180163	0.140068	0.470755
1	k	ckpt-800	0.17704	0.138685	0.442798	4.05835	3.18359	12.9201	0.177273	0.142067	0.440439
1	k	ckpt-29	0.177041	0.138688	0.442809	4.11036	3.27455	13.4596	0.179406	0.139475	0.462516
1	v	ckpt-120	0.0384276	0.0229446	0.123896	1.24005	0.95947	1.18979	0.0393729	0.0244114	0.13292
1	v	ckpt-800	0.0384185	0.0229175	0.123925	1.23839	1.00485	1.24439	0.0391507	0.0235992	0.136879
1	v	ckpt-29	0.0384138	0.022939	0.123958	1.23649	0.994933	1.23022	0.0396473	0.0236498	0.13419
15	down	ckpt-120	0.0881579	0.0740117	0.18756	9.66251	4.64762	44.9077	0.0890999	0.0746319	0.191179
15	down	ckpt-800	0.0881574	0.074012	0.187557	9.67037	4.64902	44.9577	0.0892267	0.0745842	0.187916
15	down	ckpt-29	0.0881575	0.0740222	0.187581	9.66215	4.78679	46.2507	0.0897481	0.0741052	0.19958
15	q	ckpt-120	0.0664308	0.0476854	0.177987	4.02364	3.8134	15.3437	0.0647451	0.0445315	0.17515
15	q	ckpt-800	0.0664308	0.0476504	0.178018	4.03368	3.90641	15.7572	0.0698961	0.0508072	0.189563
15	q	ckpt-29	0.0664304	0.0476521	0.178033	4.02047	3.90468	15.6987	0.0742227	0.0574312	0.192488
15	k	ckpt-120	0.0911466	0.0562676	0.293902	2.19363	2.14982	4.71589	0.0876529	0.0534407	0.277485
15	k	ckpt-800	0.0911524	0.0562696	0.293855	2.18577	2.16302	4.72787	0.092981	0.0622976	0.297749
15	k	ckpt-29	0.09115	0.0562578	0.293858	2.23834	2.16631	4.84894	0.0828449	0.0470227	0.275932
15	v	ckpt-120	0.058809	0.0446443	0.159895	1.32096	1.23215	1.62762	0.0620118	0.0453339	0.170896
15	v	ckpt-800	0.0588106	0.0446777	0.159886	1.29943	1.23956	1.61072	0.0605325	0.0450159	0.169374
15	v	ckpt-29	0.0588115	0.0446833	0.159893	1.25226	1.23126	1.54185	0.0603912	0.045488	0.161401
28	down	ckpt-120	0.0525742	0.0391481	0.10601	7.96379	5.01189	39.9137	0.0520812	0.0388432	0.108258
28	down	ckpt-800	0.0525743	0.039084	0.105966	7.957	5.05074	40.1887	0.0521358	0.0383964	0.108965
28	down	ckpt-29	0.0525473	0.0391577	0.105955	7.96053	5.04007	40.1216	0.0533634	0.03997	0.104606
28	q	ckpt-120	0.0697221	0.0353819	0.201405	7.84311	5.06366	39.7148	0.069614	0.0345809	0.197493
28	q	ckpt-800	0.0697222	0.0354067	0.201418	7.84506	5.07337	39.8009	0.0699847	0.035726	0.203509
28	q	ckpt-29	0.0697211	0.0353982	0.201433	7.84494	5.12806	40.2293	0.0698683	0.0345278	0.209825
28	k	ckpt-120	0.0995012	0.082022	0.237047	2.00693	1.89286	3.79884	0.102578	0.0887858	0.229438
28	k	ckpt-800	0.0995012	0.0820484	0.237064	2.0237	1.86839	3.78106	0.100319	0.0848999	0.232338
28	k	ckpt-29	0.0995016	0.0820563	0.237057	2.02846	1.91757	3.88972	0.101923	0.0894597	0.231271
28	v	ckpt-120	0.238469	0.219652	0.490312	4.50356	4.20855	18.9535	0.239	0.225059	0.485023
28	v	ckpt-800	0.238468	0.219633	0.49029	4.43913	4.27056	18.9576	0.240404	0.22902	0.482317
28	v	ckpt-29	0.238469	0.219628	0.490303	4.52176	4.21462	19.0575	0.242815	0.23141	0.479774
