# Supplementary material
Source: ML conference proceedings conference paper supplement (https://openreview.net/forum?id=uLOZyM12LJ)

ID vs OOD Loss (LLaMA-11B)

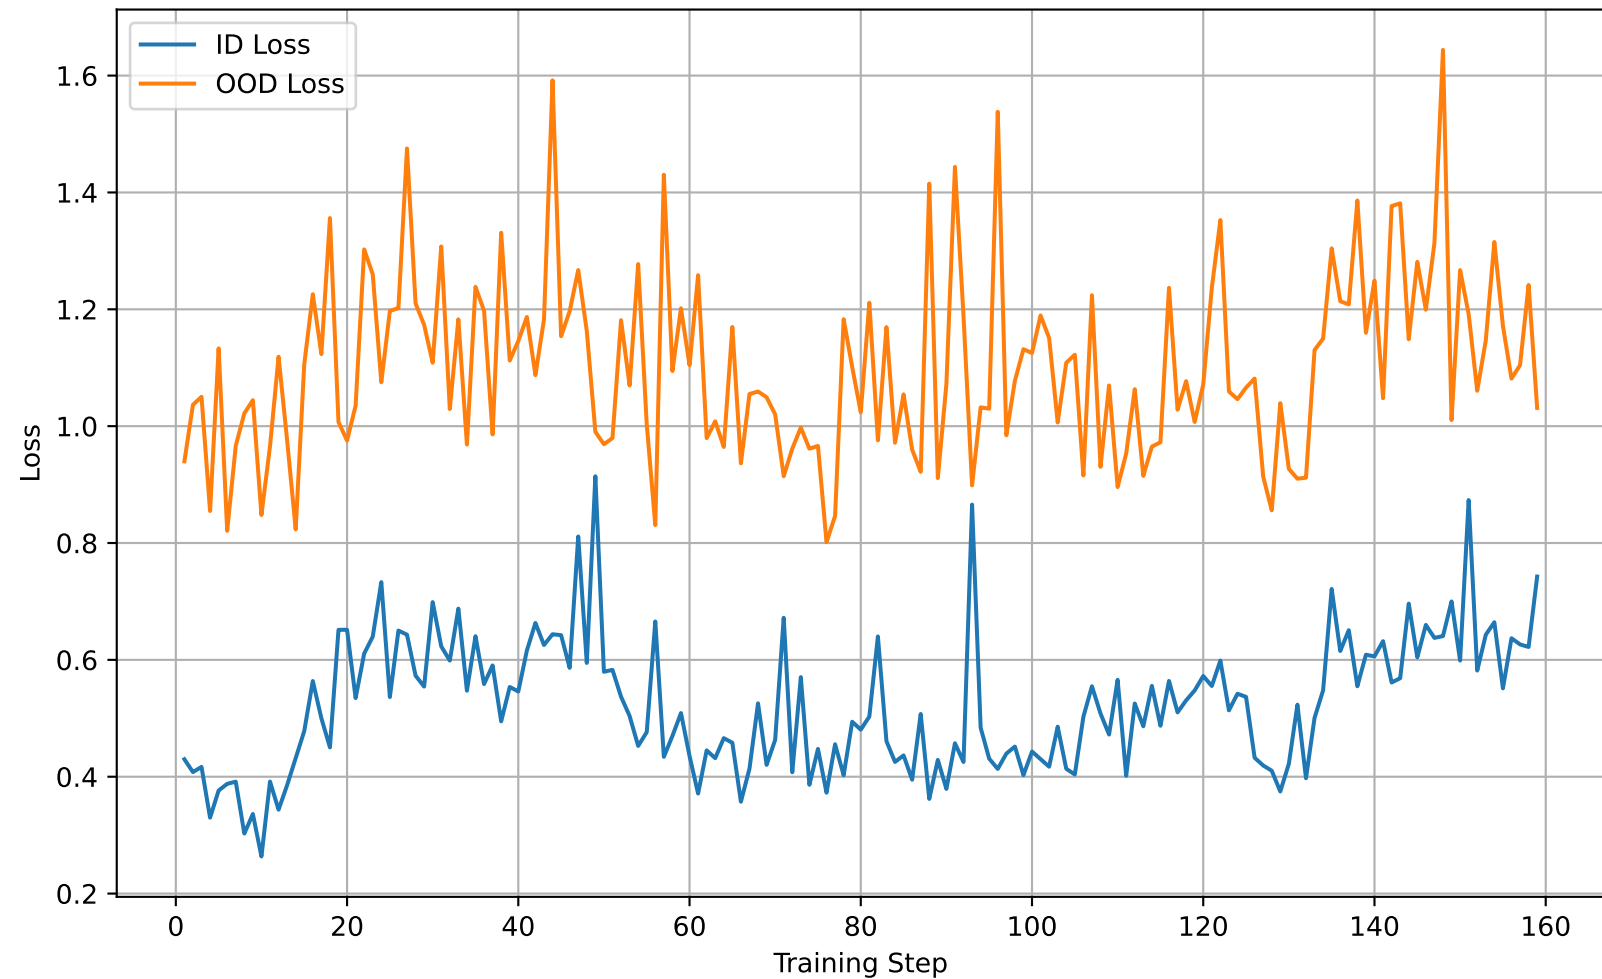

Supplement: supplementary_material [file rl-id_ood_llama-11b.pdf › RL_Heals_SFT/analysis/loss/rl-id_ood_llama-11b.pdf]

ID vs OOD Loss (Qwen-7B)

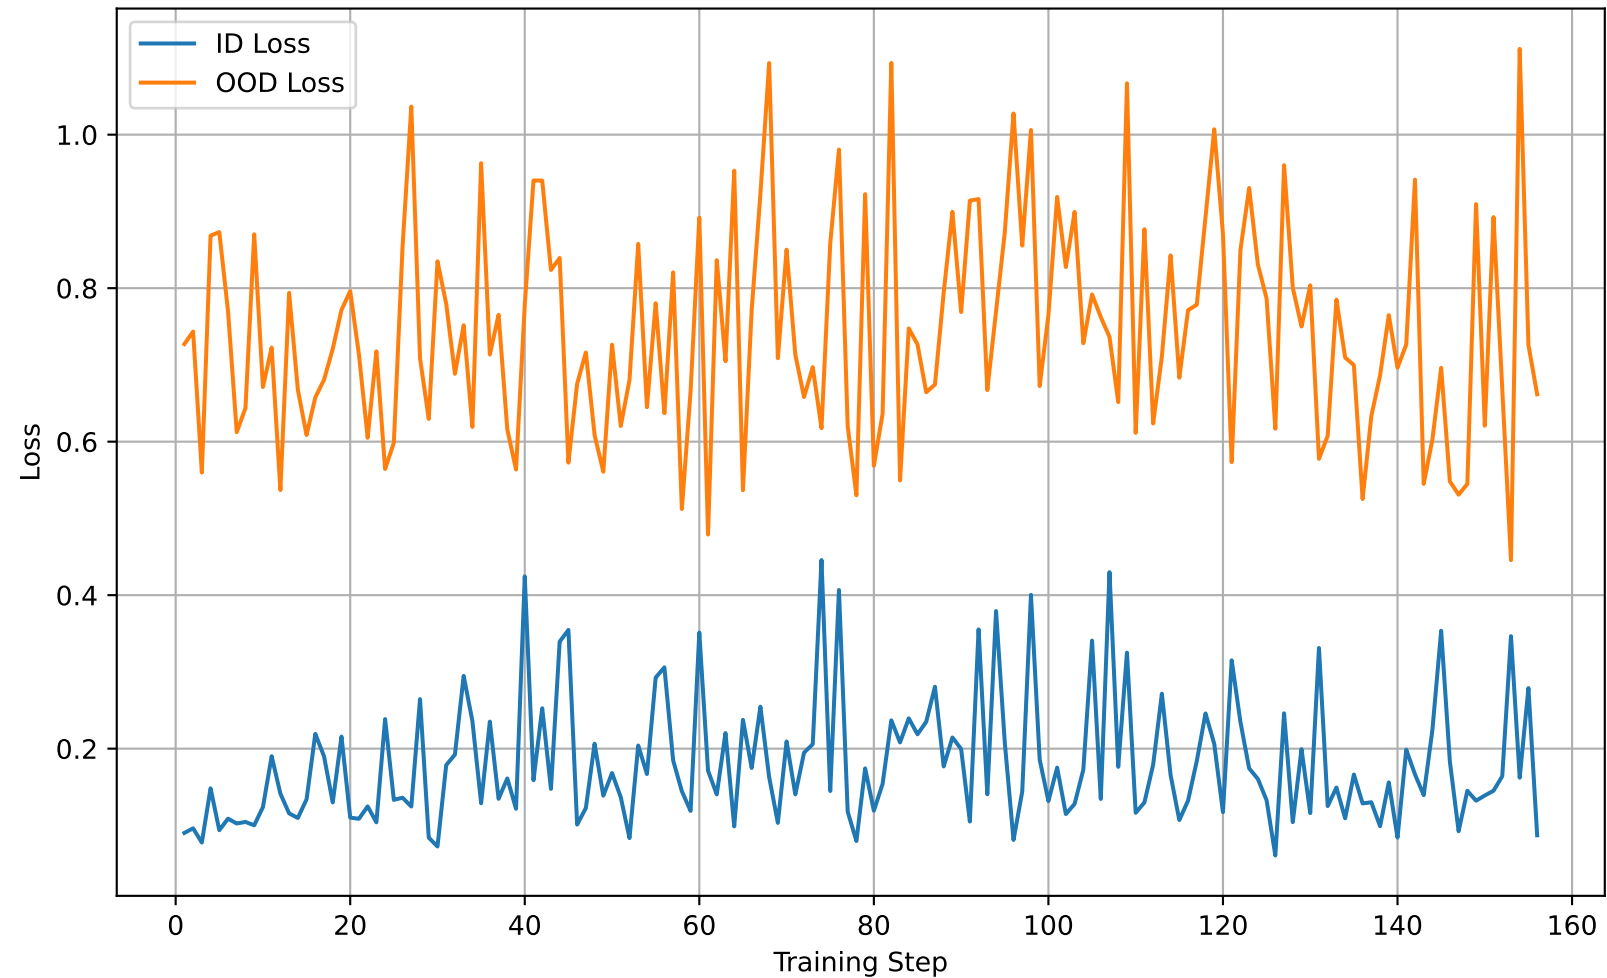

Supplement: supplementary_material [file rl-id_ood_qwen-7b.pdf › RL_Heals_SFT/analysis/loss/rl-id_ood_qwen-7b.pdf]

k\_proj:  $\Sigma$  (dashed) vs  $\Delta\Sigma$  (gray)

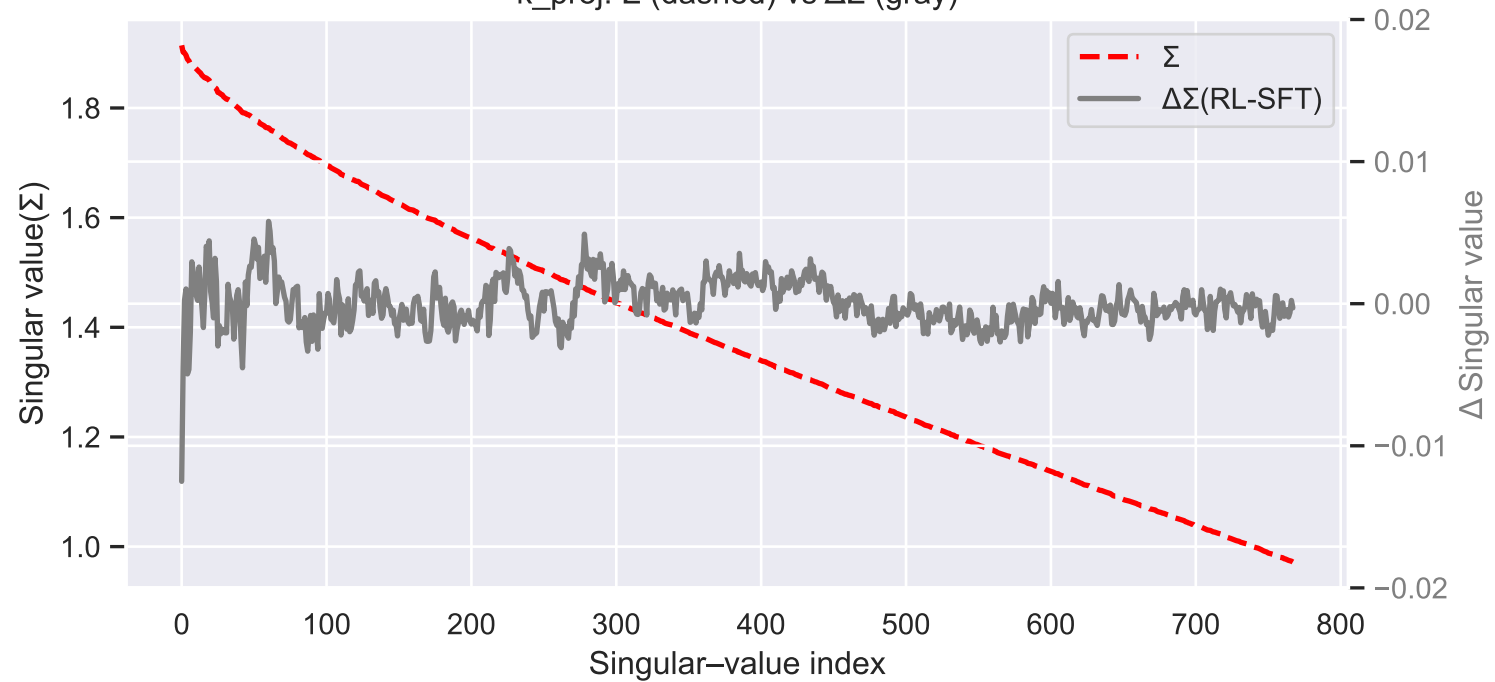

Supplement: supplementary_material [file singular_value_rl-k_proj.pdf › RL_Heals_SFT/analysis/singular_value_rl-k_proj.pdf]

q\_proj:  $\Sigma$  (dashed) vs  $\Delta\Sigma$  (gray)

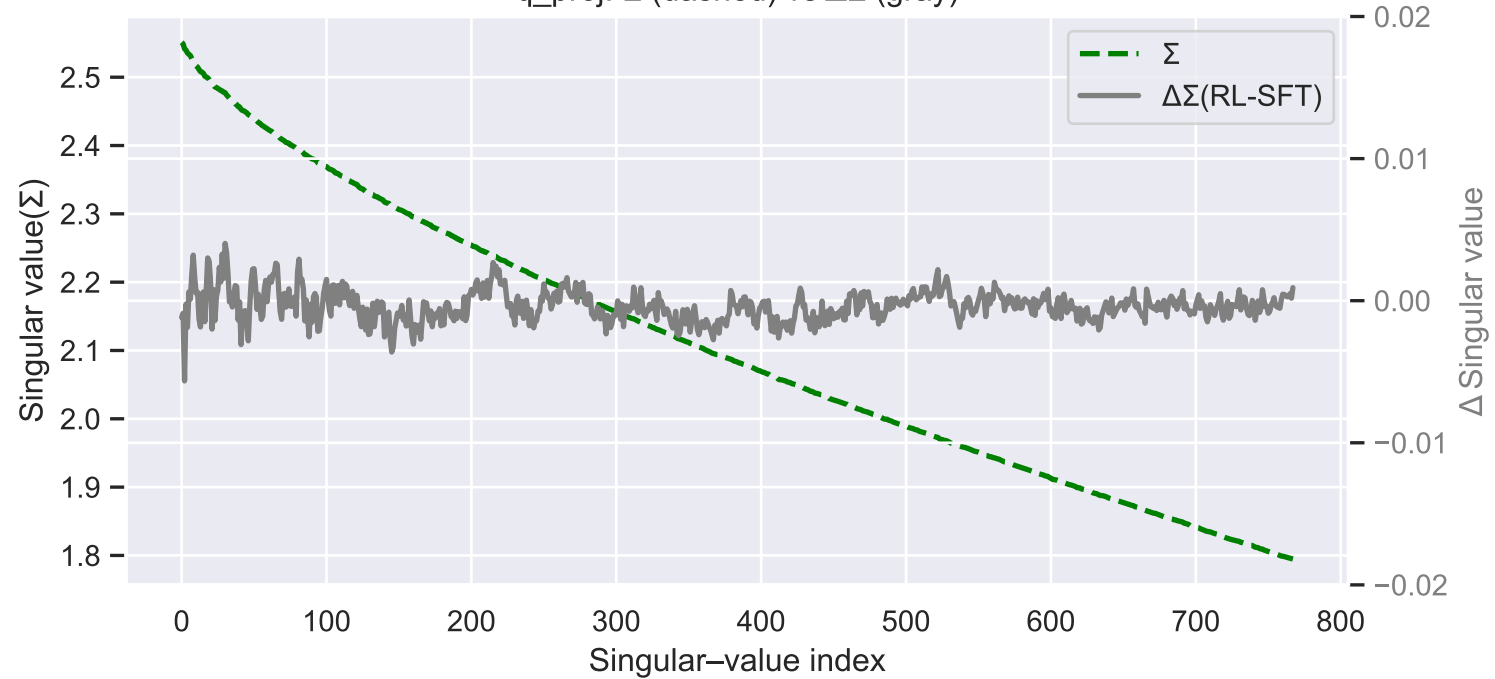

Supplement: supplementary_material [file singular_value_rl-q_proj.pdf › RL_Heals_SFT/analysis/singular_value_rl-q_proj.pdf]

v\_proj:  $\Sigma$  (dashed) vs  $\Delta\Sigma$  (gray)

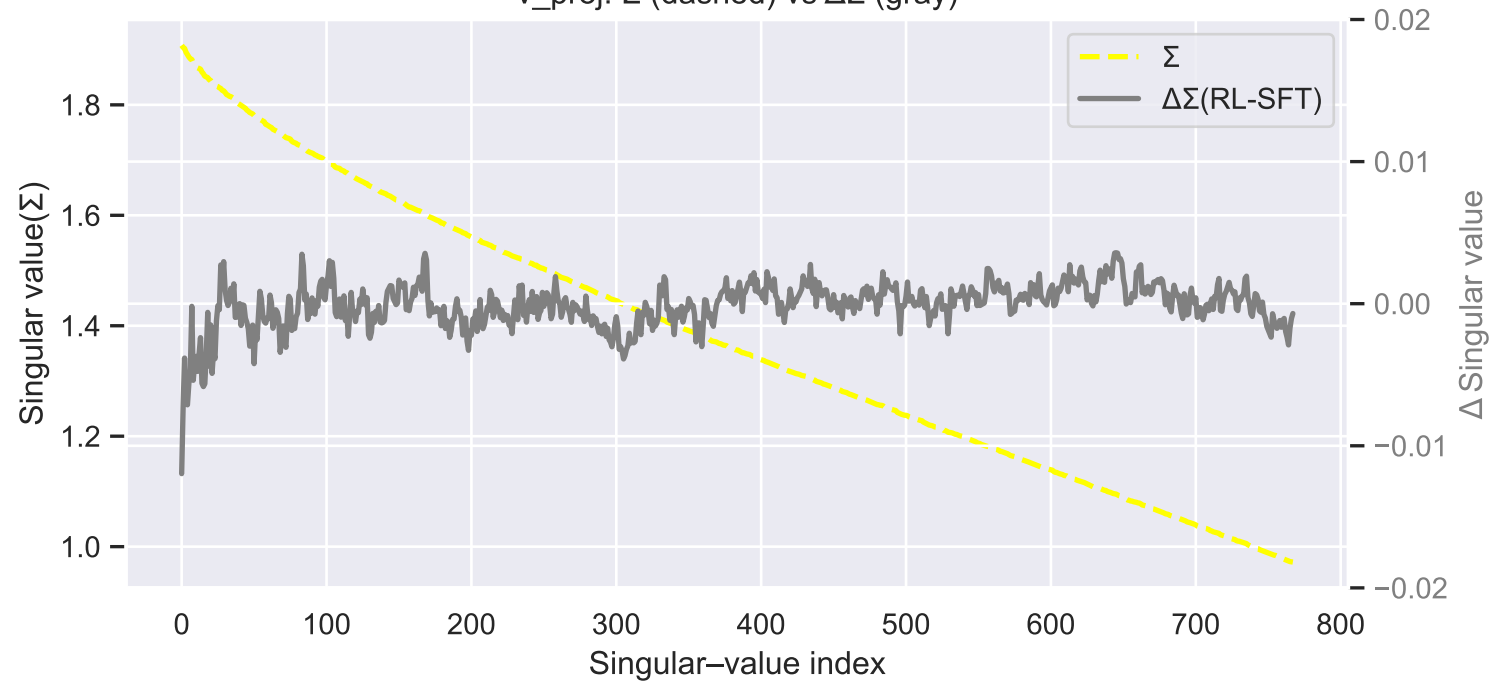

Supplement: supplementary_material [file singular_value_rl-v_proj.pdf › RL_Heals_SFT/analysis/singular_value_rl-v_proj.pdf]

k\_proj:  $\Sigma$  (dashed) vs  $\Delta\Sigma$  (gray)

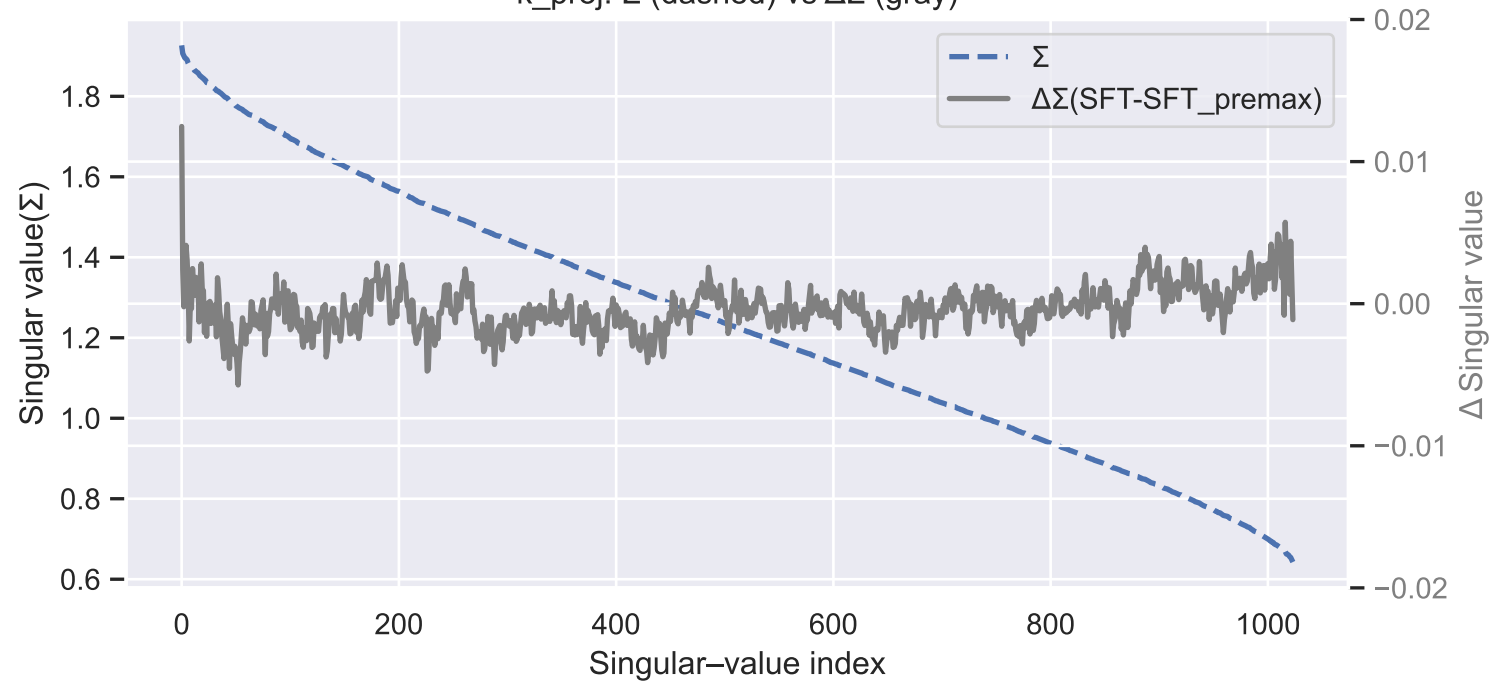

Supplement: supplementary_material [file singular_value_sft-k_proj.pdf › RL_Heals_SFT/analysis/singular_value_sft-k_proj.pdf]

q\_proj:  $\Sigma$  (dashed) vs  $\Delta\Sigma$  (gray)

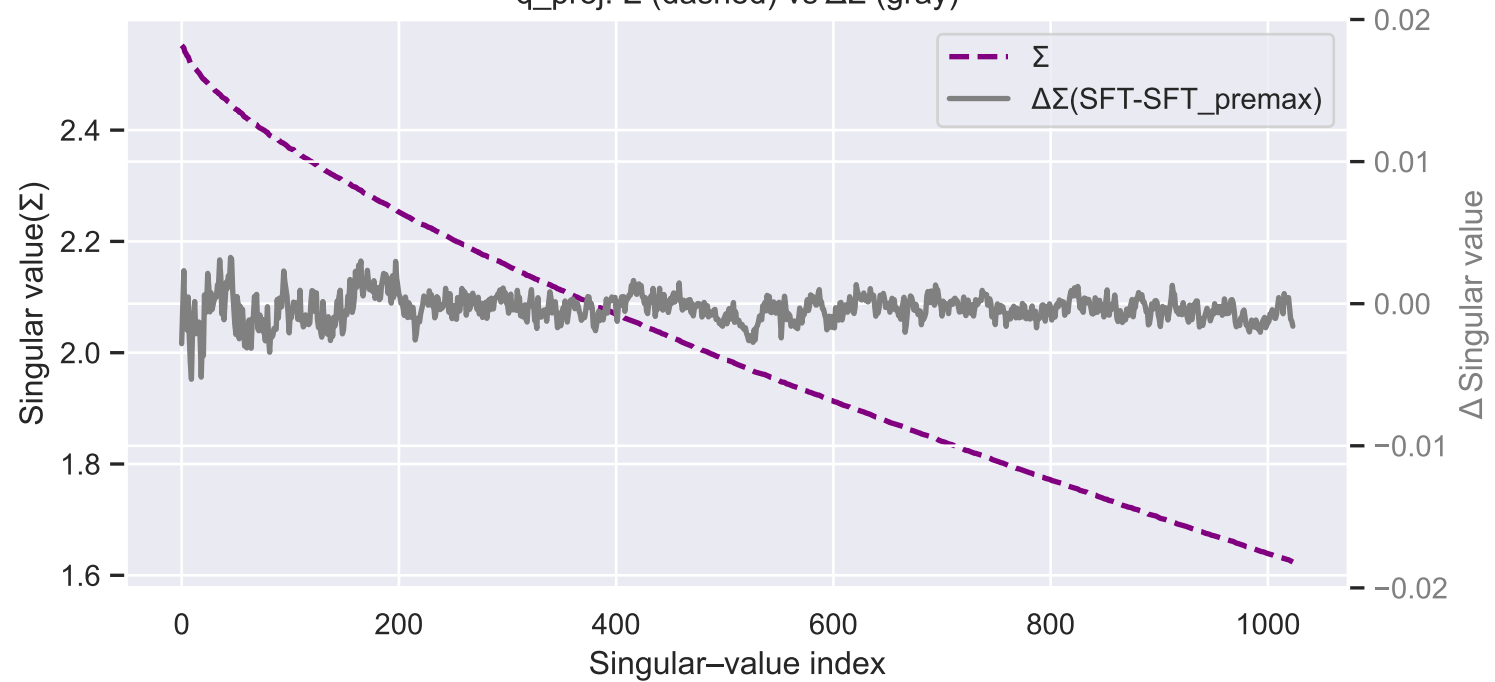

Supplement: supplementary_material [file singular_value_sft-q_proj.pdf › RL_Heals_SFT/analysis/singular_value_sft-q_proj.pdf]

v\_proj:  $\Sigma$  (dashed) vs  $\Delta\Sigma$  (gray)

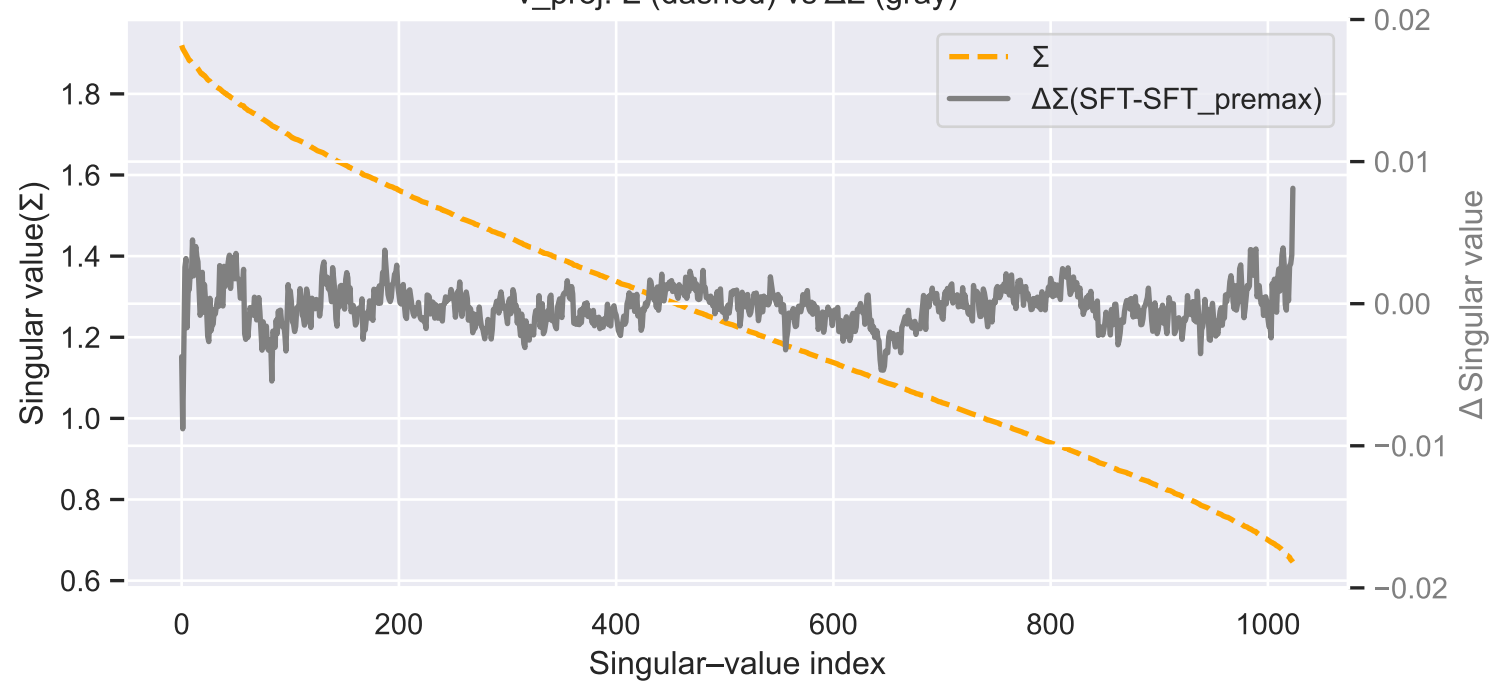

Supplement: supplementary_material [file singular_value_sft-v_proj.pdf › RL_Heals_SFT/analysis/singular_value_sft-v_proj.pdf]

Task 1 Performance by Stage (ID vs OOD)

ID

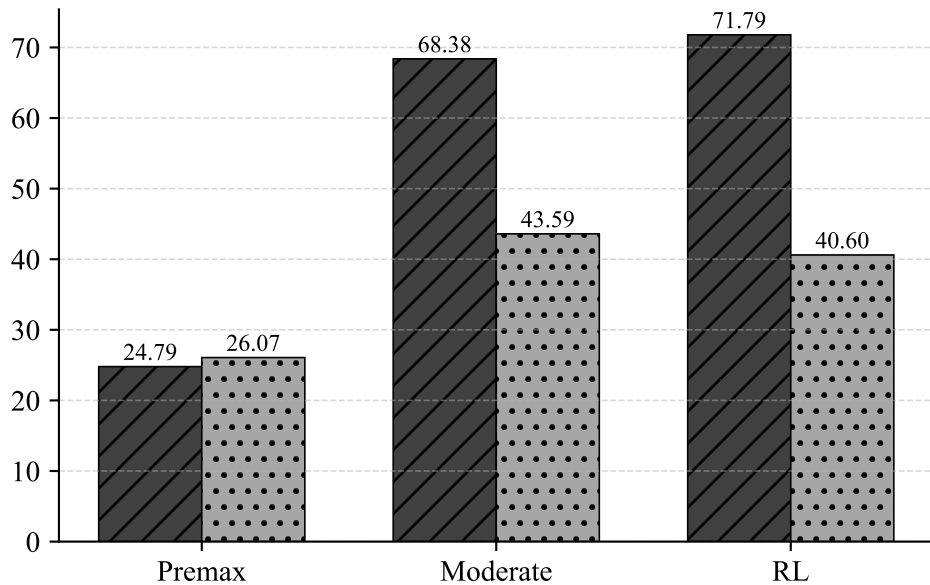

OOD

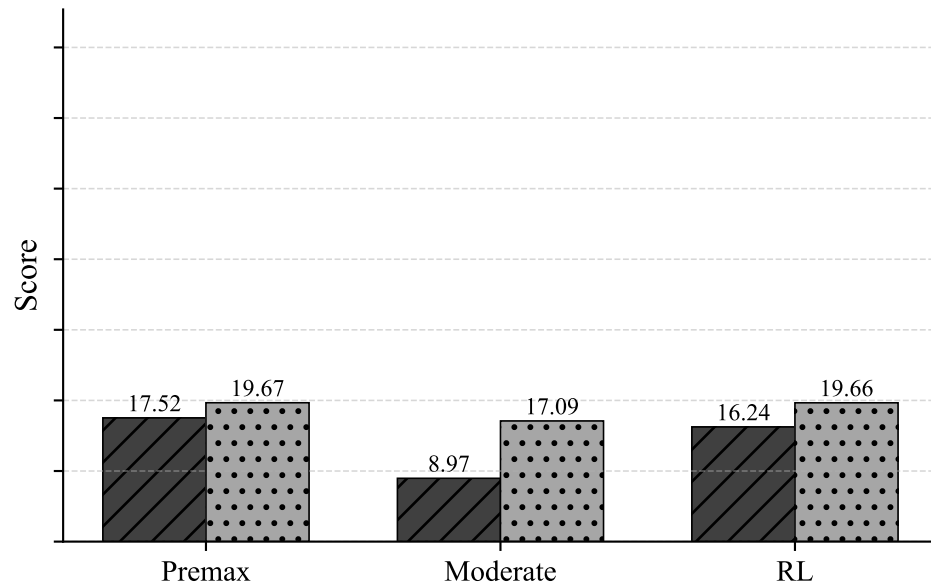

Llama Qwen

Supplement: supplementary_material [file task1_grouped.pdf › RL_Heals_SFT/analysis/task1_grouped.pdf]

Task 2 Performance by Stage (ID vs OOD)

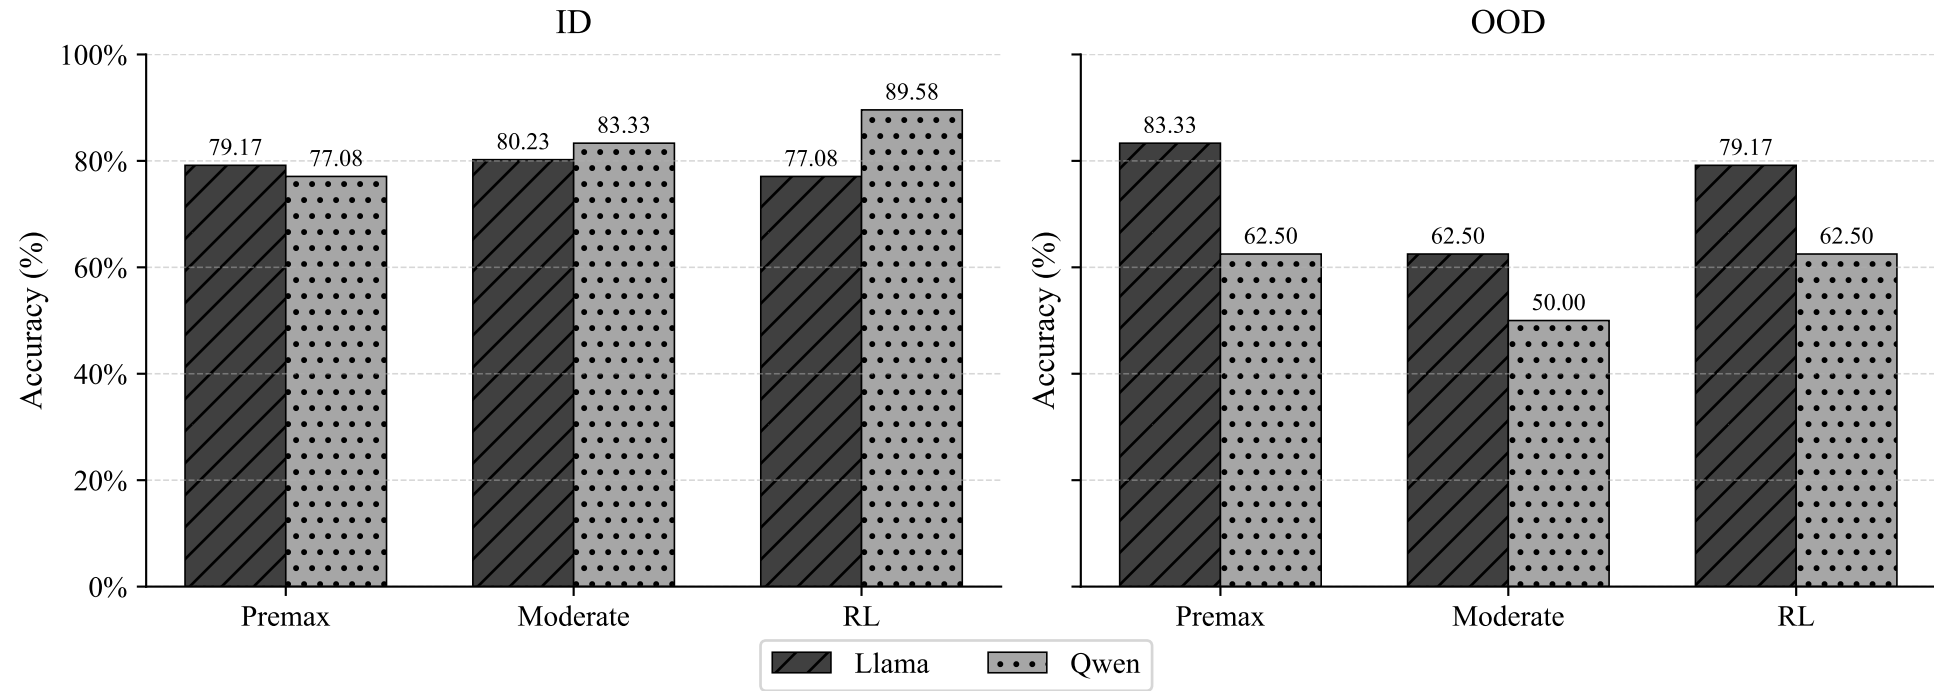

Supplement: supplementary_material [file task2_grouped.pdf › RL_Heals_SFT/analysis/task2_grouped.pdf]

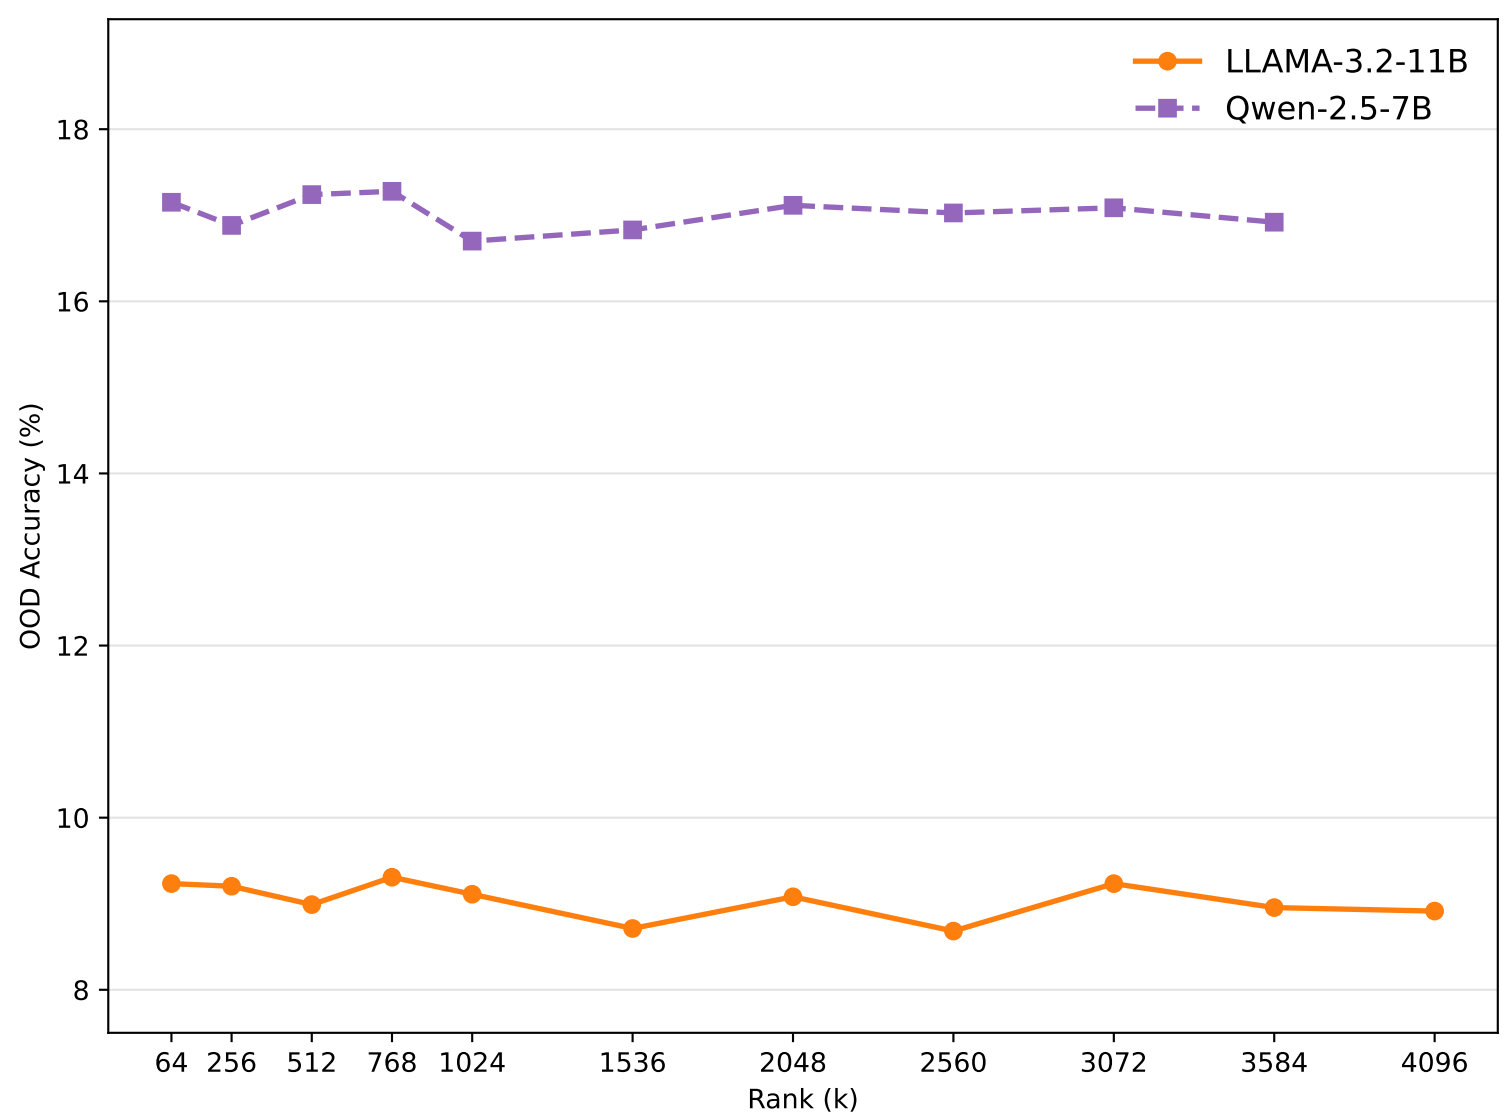

Supplement: supplementary_material [file ood_for_singular_values.pdf › RL_Heals_SFT/analysis/tsne/ood_for_singular_values.pdf]

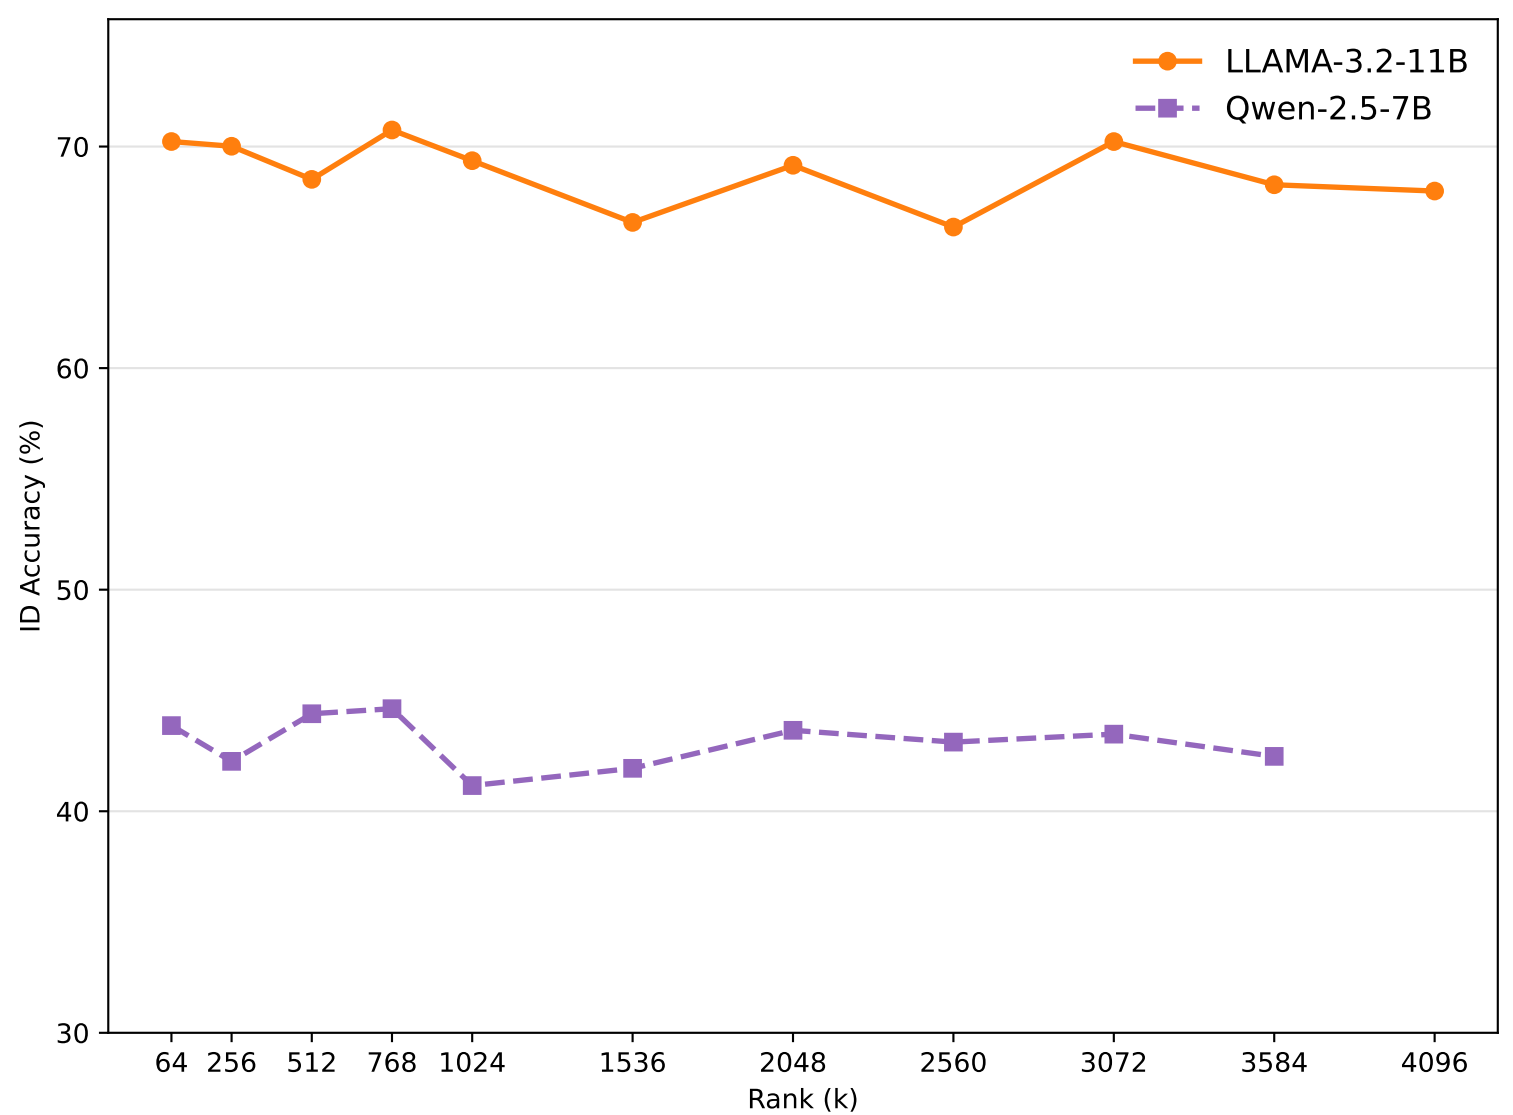

Supplement: supplementary_material [file singular_values_id.pdf › RL_Heals_SFT/analysis/tsne/singular_values_id.pdf]

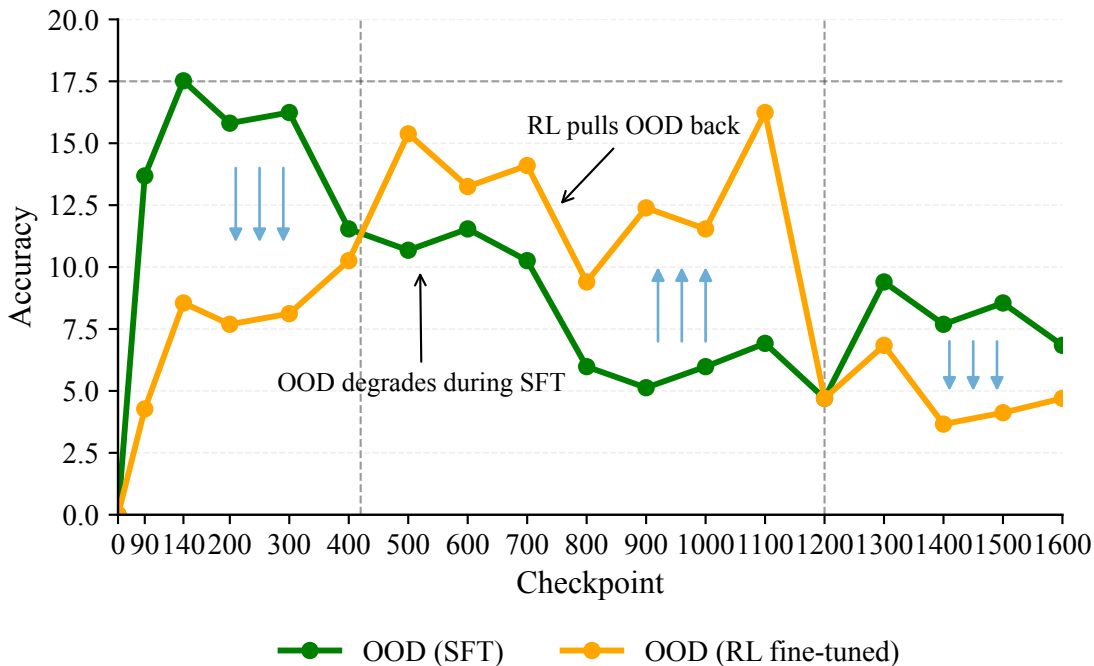

Supplement: supplementary_material [file llama_ood_recovery_line-full.pdf › RL_Heals_SFT/figures/llama_ood_recovery_line-full.pdf]

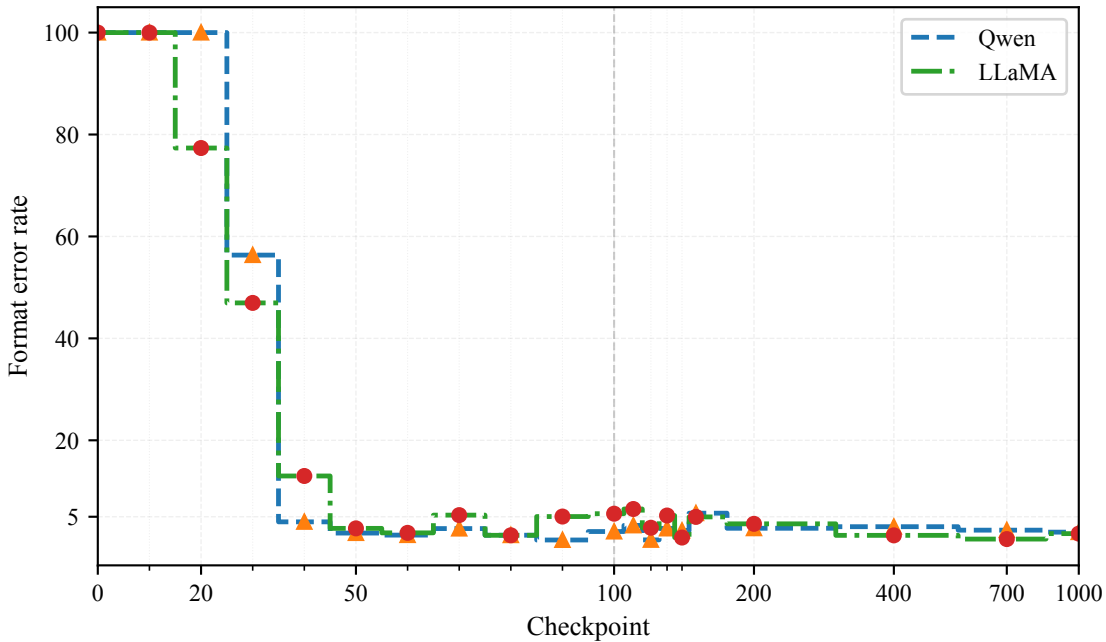

Supplement: supplementary_material [file sft_format_error_percent.pdf › RL_Heals_SFT/figures/sft_format_error_percent.pdf]

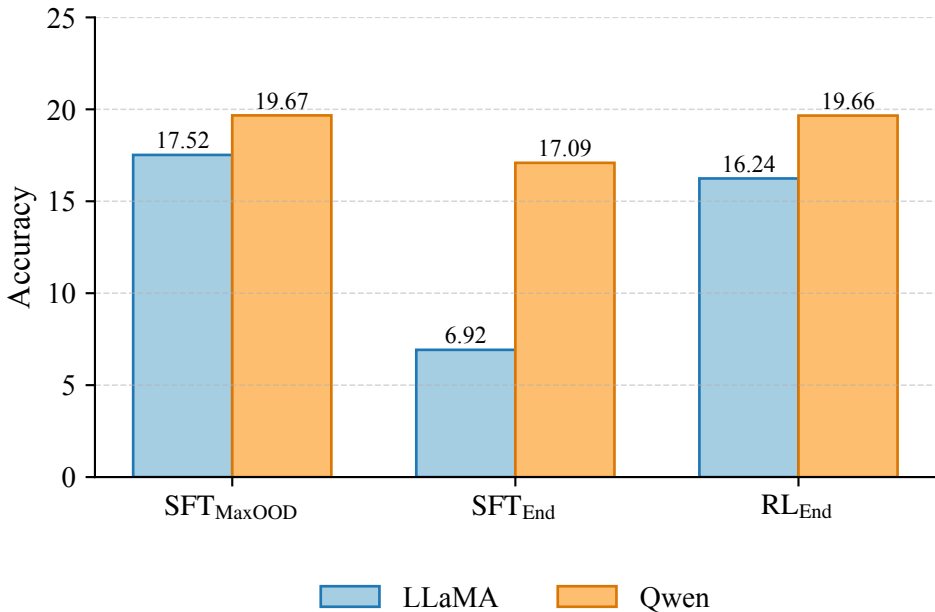

Supplement: supplementary_material [file task_acc_generalpoints_ood.pdf › RL_Heals_SFT/figures/task_acc_generalpoints_ood.pdf]

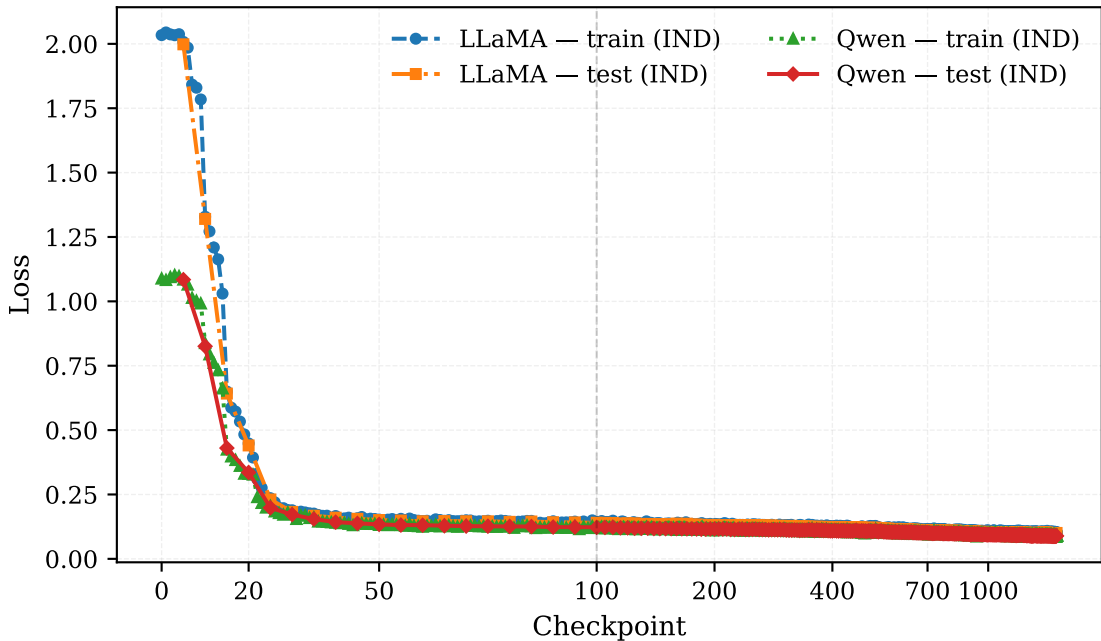

Supplement: supplementary_material [file test-loss-2000-ind-merged.pdf › RL_Heals_SFT/figures/test-loss-2000-ind-merged.pdf]
